# Supplementary material for: Differences in diabetes prevalence and inequalities in disease management and glycaemic control by immigrant status: a population-based study (Italy)
Source: Springer Nature journal article supplement (doi:10.1186/s12889-015-1403-4), 2015-02-05
Supplement: MOESM1 [file 9748638]

| Istat code | Country                                | HDC/HMPC | subregion                       | population 20-74 years |         |         | people with diabetes 20-74 years |       |        | crude prevalence (x100) |          |         |         |
|------------|----------------------------------------|----------|---------------------------------|------------------------|---------|---------|----------------------------------|-------|--------|-------------------------|----------|---------|---------|
|            |                                        |          |                                 | M                      | F       | T       | M                                | F     | T      | M                       | F        | T       |         |
| 100        | Italy                                  |          |                                 | 162,936                | 160,740 | 323,676 | 9,380                            | 6,509 | 15,889 | 5.7569                  | 4.0494   | 4.9089  |         |
| 701        | Australia                              | HDC      |                                 | 3                      | 2       | 5       |                                  |       |        |                         |          |         |         |
| 203        | Austria                                | HDC      |                                 | 7                      | 19      | 26      |                                  |       |        |                         |          |         |         |
| 206        | Belgium                                | HDC      |                                 | 14                     | 17      | 31      | 1                                |       | 1      | 7.1429                  | 0.0000   | 3.2258  |         |
| 509        | Canada                                 | HDC      |                                 | 2                      | 4       | 6       |                                  |       |        |                         |          |         |         |
| 212        | Denmark                                | HDC      |                                 | 11                     | 8       | 19      | 1                                |       | 1      | 9.0909                  | 0.0000   | 5.2632  |         |
| 214        | Finland                                | HDC      |                                 | 1                      | 18      | 19      |                                  |       |        |                         |          |         |         |
| 215        | France                                 | HDC      |                                 | 52                     | 92      | 144     |                                  | 1     | 1      | 0.0000                  | 1.0870   | 0.6944  |         |
| 216        | Germany                                | HDC      |                                 | 46                     | 111     | 157     | 1                                | 1     | 2      | 2.1739                  | 0.9009   | 1.2739  |         |
| 220        | Greece                                 | HDC      |                                 | 19                     | 6       | 25      |                                  |       |        |                         |          |         |         |
| 223        | Iceland                                | HDC      |                                 | 2                      | 2       | 2       | 1                                |       | 1      | 50.0000                 | 50.0000  |         |         |
| 221        | Ireland                                | HDC      |                                 | 3                      | 9       | 12      |                                  |       |        |                         |          |         |         |
| 334        | Israel                                 | HDC      |                                 | 2                      | 3       | 5       |                                  |       |        |                         |          |         |         |
| 326        | Japan                                  | HDC      |                                 | 1                      | 15      | 16      |                                  |       |        |                         |          |         |         |
| 320        | Korea, Democratic People's Republic of | HDC      |                                 | 4                      | 4       | 4       |                                  |       | 0      | 0.0000                  | 0.0000   |         |         |
| 232        | Netherlands                            | HDC      |                                 | 15                     | 13      | 28      |                                  | 1     | 1      | 0.0000                  | 7.6923   | 3.5714  |         |
| 719        | New Zealand                            | HDC      |                                 | 1                      | 1       | 1       |                                  |       |        |                         |          |         |         |
| 231        | Norway                                 | HDC      |                                 | 4                      | 3       | 7       | 1                                |       | 1      | 0.0000                  | 33.3333  | 14.2857 |         |
| 234        | Portugal                               | HDC      |                                 | 11                     | 16      | 27      |                                  |       |        |                         |          |         |         |
| 236        | San Marino                             | HDC      |                                 | 3                      | 4       | 7       |                                  |       |        |                         |          |         |         |
| 239        | Spain                                  | HDC      |                                 | 27                     | 130     | 157     |                                  | 1     | 1      | 0.0000                  | 0.7692   | 0.6369  |         |
| 240        | Sweden                                 | HDC      |                                 | 4                      | 10      | 14      |                                  |       |        |                         |          |         |         |
| 241        | Switzerland                            | HDC      |                                 | 9                      | 9       | 18      |                                  |       |        |                         |          |         |         |
| 219        | United Kingdom                         | HDC      |                                 | 57                     | 65      | 122     | 1                                | 1     | 2      | 1.7544                  | 1.5385   | 1.6393  |         |
| 536        | United States                          | HDC      |                                 | 11                     | 21      | 32      |                                  |       |        |                         |          |         |         |
| 246        | Vatican City State                     | HDC      |                                 | 1                      | 1       | 1       |                                  |       |        |                         |          |         |         |
| 201        | Albania                                | HMPC     | Europe no HDC                   | 2,687                  | 2,128   | 4,815   | 76                               | 63    | 139    | 2.8284                  | 2.9605   | 2.8868  |         |
| 256        | Belarus                                | HMPC     | Europe no HDC                   | 7                      | 63      | 70      |                                  |       |        |                         |          |         |         |
| 252        | Bosnia and Herzegovina                 | HMPC     | Europe no HDC                   | 49                     | 34      | 83      | 3                                | 1     | 4      | 6.1224                  | 2.9412   | 4.8193  |         |
| 209        | Bulgaria                               | HMPC     | Europe no HDC                   | 83                     | 130     | 213     | 2                                | 2     | 4      | 2.4096                  | 1.5385   | 1.8779  |         |
| 250        | Croatia                                | HMPC     | Europe no HDC                   | 61                     | 55      | 116     |                                  |       |        |                         |          |         |         |
| 257        | Czech Republic                         | HMPC     | Europe no HDC                   | 13                     | 66      | 79      |                                  | 1     | 1      | 0.0000                  | 1.5152   | 1.2658  |         |
| 247        | Estonia                                | HMPC     | Europe no HDC                   | 1                      | 18      | 19      |                                  |       |        |                         |          |         |         |
| 244        | Hungary                                | HMPC     | Europe no HDC                   | 16                     | 35      | 51      |                                  |       |        |                         |          |         |         |
| 272        | Kosovo                                 | HMPC     | Europe no HDC                   | 16                     | 21      | 37      |                                  | 1     | 1      | 0.0000                  | 4.7619   | 2.7027  |         |
| 248        | Latvia                                 | HMPC     | Europe no HDC                   | 12                     | 43      | 55      | 1                                | 1     | 0.0000 | 2.3256                  | 1.8182   |         |         |
| 249        | Lithuania                              | HMPC     | Europe no HDC                   | 21                     | 45      | 66      |                                  |       |        |                         |          |         |         |
| 253        | Macedonia (FYROM)                      | HMPC     | Europe no HDC                   | 170                    | 147     | 317     | 5                                | 6     | 11     | 2.9412                  | 4.0816   | 3.4700  |         |
| 227        | Malta                                  | HMPC     | Europe no HDC                   | 1                      | 2       | 3       |                                  |       |        |                         |          |         |         |
| 254        | Moldova, Republic of                   | HMPC     | Europe no HDC                   | 529                    | 1,277   | 1,806   | 9                                | 16    | 25     | 1.7013                  | 1.2529   | 1.3843  |         |
| 270        | Montenegro                             | HMPC     | Europe no HDC                   | 1                      | 1       | 2       |                                  |       |        |                         |          |         |         |
| 233        | Poland                                 | HMPC     | Europe no HDC                   | 192                    | 851     | 1,043   | 3                                | 10    | 13     | 1.5625                  | 1.1751   | 1.2464  |         |
| 235        | Romania                                | HMPC     | Europe no HDC                   | 1,511                  | 2,047   | 3,558   | 16                               | 20    | 36     | 1.0589                  | 0.9770   | 1.0118  |         |
| 245        | Russian Federation                     | HMPC     | Europe no HDC                   | 46                     | 375     | 421     |                                  | 2     | 2      | 0.0000                  | 0.5333   | 0.4751  |         |
| 271        | Serbia                                 | HMPC     | Europe no HDC                   | 377                    | 243     | 620     |                                  |       |        |                         |          |         |         |
| 255        | Slovakia                               | HMPC     | Europe no HDC                   | 29                     | 44      | 73      |                                  |       |        |                         |          |         |         |
| 251        | Slovenia                               | HMPC     | Europe no HDC                   | 5                      | 8       | 13      |                                  |       |        |                         |          |         |         |
| 243        | Ukraine                                | HMPC     | Europe no HDC                   | 464                    | 2,672   | 3,136   | 3                                | 41    | 44     | 0.6466                  | 1.5344   | 1.4031  |         |
| 602        | Argentina                              | HMPC     | Latin America and the Caribbean | 65                     | 83      | 148     | 4                                | 4     | 8      | 6.1538                  | 0.0000   | 2.7027  |         |
| 604        | Bolivia, Plurinational State of        | HMPC     | Latin America and the Caribbean | 0                      | 5       | 5       |                                  |       |        |                         |          |         |         |
| 605        | Brazil                                 | HMPC     | Latin America and the Caribbean | 132                    | 362     | 494     | 2                                | 5     | 7      | 1.5152                  | 1.3812   | 1.4170  |         |
| 606        | Chile                                  | HMPC     | Latin America and the Caribbean | 8                      | 15      | 23      | 1                                |       | 1      | 12.5000                 | 0.0000   | 4.3478  |         |
| 608        | Colombia                               | HMPC     | Latin America and the Caribbean | 65                     | 130     | 195     |                                  | 5     | 5      | 0.0000                  | 3.8462   | 2.5641  |         |
| 513        | Costa Rica                             | HMPC     | Latin America and the Caribbean | 1                      | 4       | 4       |                                  |       |        |                         |          |         |         |
| 514        | Cuba                                   | HMPC     | Latin America and the Caribbean | 52                     | 178     | 230     |                                  | 3     | 3      | 0.0000                  | 1.6854   | 1.3043  |         |
| 515        | Dominica                               | HMPC     | Latin America and the Caribbean | 2                      | 3       | 5       |                                  |       |        |                         |          |         |         |
| 516        | Dominican Republic                     | HMPC     | Latin America and the Caribbean | 91                     | 206     | 297     | 1                                | 8     | 9      | 1.0989                  | 3.8835   | 3.0303  |         |
| 609        | Ecuador                                | HMPC     | Latin America and the Caribbean | 11                     | 37      | 48      | 1                                | 1     | 2      | 9.0909                  | 2.7027   | 4.1667  |         |
| 517        | El Salvador                            | HMPC     | Latin America and the Caribbean | 6                      | 8       | 14      |                                  |       |        |                         |          |         |         |
| 525        | Honduras                               | HMPC     | Latin America and the Caribbean | 0                      | 2       | 2       |                                  |       |        |                         |          |         |         |
| 518        | Jamaica                                | HMPC     | Latin America and the Caribbean | 1                      | 1       | 1       |                                  |       |        |                         |          |         |         |
| 527        | Mexico                                 | HMPC     | Latin America and the Caribbean | 5                      | 19      | 24      |                                  |       |        |                         |          |         |         |
| 528        | Nicaragua                              | HMPC     | Latin America and the Caribbean | 2                      | 2       | 4       |                                  |       |        |                         |          |         |         |
| 530        | Panama                                 | HMPC     | Latin America and the Caribbean | 4                      | 5       | 9       |                                  |       |        |                         |          |         |         |
| 614        | Paraguay                               | HMPC     | Latin America and the Caribbean | 2                      | 9       | 11      |                                  |       |        |                         |          |         |         |
| 615        | Peru                                   | HMPC     | Latin America and the Caribbean | 18                     | 62      | 80      |                                  | 1     | 1      | 0.0000                  | 1.6129   | 1.2500  |         |
| 618        | Uruguay                                | HMPC     | Latin America and the Caribbean | 4                      | 10      | 14      |                                  |       |        |                         |          |         |         |
| 619        | Venezuela, Bolivarian Republic of      | HMPC     | Latin America and the Caribbean | 13                     | 31      | 44      |                                  |       |        |                         |          |         |         |
| 401        | Algeria                                | HMPC     | Northern Africa                 | 178                    | 96      | 274     | 5                                | 3     | 8      | 2.8090                  | 3.1250   | 2.9197  |         |
| 419        | Egypt                                  | HMPC     | Northern Africa                 | 851                    | 259     | 1,110   | 34                               | 12    | 46     | 3.9953                  | 4.6332   | 4.1441  |         |
| 431        | Libyan Arab Jamahiriya                 | HMPC     | Northern Africa                 | 6                      | 2       | 8       | 1                                |       | 1      | 16.6667                 | 0.0000   | 12.5000 |         |
| 436        | Morocco                                | HMPC     | Northern Africa                 | 3,652                  | 3,117   | 6,769   | 113                              | 163   | 276    | 3.0942                  | 5.2294   | 4.0774  |         |
| 460        | Tunisia                                | HMPC     | Northern Africa                 | 1,245                  | 650     | 1,895   | 40                               | 25    | 65     | 3.2129                  | 3.8462   | 3.4301  |         |
| 727        | Samoa                                  | HMPC     | Oceania                         | 1                      | 1       | 1       |                                  |       |        |                         |          |         |         |
| 725        | Solomon Islands                        | HMPC     | Oceania                         | 1                      | 1       | 1       |                                  |       |        |                         |          |         |         |
| 730        | Tonga                                  | HMPC     | Oceania                         | 2                      | 2       | 2       |                                  |       |        |                         |          |         |         |
| 301        | Afghanistan                            | HMPC     | Rest of Asia                    | 1                      | 1       | 1       |                                  |       |        |                         |          |         |         |
| 358        | Armenia                                | HMPC     | Rest of Asia                    | 1                      | 1       | 2       |                                  |       |        |                         |          |         |         |
| 359        | Azerbaijan                             | HMPC     | Rest of Asia                    | 1                      | 1       | 2       |                                  |       |        |                         |          |         |         |
| 314        | China                                  | HMPC     | Rest of Asia                    | 1,496                  | 1,483   | 2,979   | 32                               | 22    | 54     | 2.1390                  | 1.4835   | 1.8127  |         |
| 360        | Georgia                                | HMPC     | Rest of Asia                    | 50                     | 293     | 343     | 1                                | 4     | 5      | 2.0000                  | 1.3652   | 1.4577  |         |
| 331        | Indonesia                              | HMPC     | Rest of Asia                    | 2                      | 13      | 15      |                                  |       |        |                         |          |         |         |
| 333        | Iran                                   | HMPC     | Rest of Asia                    | 1                      | 1       | 4       |                                  |       | 1      | 1                       | 12.5000  | 10.0000 | 11.1111 |
| 327        | Jordan                                 | HMPC     | Rest of Asia                    | 13                     | 8       | 21      |                                  | 2     | 2      | 0.0000                  | 25.0000  | 9.5238  |         |
| 356        | Kazakhstan                             | HMPC     | Rest of Asia                    | 1                      | 11      | 12      |                                  | 1     | 1      | 0.0000                  | 9.0909   | 8.3333  |         |
| 335        | Kuwait                                 | HMPC     | Rest of Asia                    | 1                      | 1       | 1       |                                  |       |        |                         |          |         |         |
| 361        | Kyrgyzstan                             | HMPC     | Rest of Asia                    | 6                      | 6       | 6       |                                  |       |        |                         |          |         |         |
| 336        | Lao People's Democratic Republic       | HMPC     | Rest of Asia                    | 7                      | 4       | 11      | 1                                |       | 1      | 14.2857                 | 0.0000   | 9.0909  |         |
| 337        | Lebanon                                | HMPC     | Rest of Asia                    | 8                      | 8       | 16      |                                  |       |        |                         |          |         |         |
| 340        | Malaysia                               | HMPC     | Rest of Asia                    | 2                      | 2       | 2       |                                  |       |        |                         |          |         |         |
| 323        | Philippines                            | HMPC     | Rest of Asia                    | 115                    | 217     | 332     | 6                                | 8     | 14     | 5.2174                  | 3.6866   | 4.2169  |         |
| 346        | Singapore                              | HMPC     | Rest of Asia                    | 1                      | 1       | 1       |                                  |       |        |                         |          |         |         |
| 348        | Syrian Arab Republic                   | HMPC     | Rest of Asia                    | 8                      | 10      | 18      |                                  | 1     | 1      | 12.5000                 | 10.0000  | 11.1111 |         |
| 363        | Taiwan, Province of China              | HMPC     | Rest of Asia                    | 3                      | 5       | 8       |                                  |       |        |                         |          |         |         |
| 349        | Thailand                               | HMPC     | Rest of Asia                    | 4                      | 77      | 81      |                                  |       |        |                         |          |         |         |
| 351        | Turkey                                 | HMPC     | Rest of Asia                    | 334                    | 247     | 581     | 4                                | 8     | 12     | 1.1976                  | 3.2389   | 2.0654  |         |
| 357        | Uzbekistan                             | HMPC     | Rest of Asia                    | 8                      | 31      | 39      |                                  |       |        |                         |          |         |         |
| 353        | Viet Nam                               | HMPC     | Rest of Asia                    | 18                     | 26      | 44      | 1                                | 1     | 2      | 5.5556                  | 3.8462   | 4.5455  |         |
| 354        | Yemen                                  | HMPC     | Rest of Asia                    | 1                      | 4       | 5       |                                  | 1     | 1      | 100.0000                | 0.0000   | 20.0000 |         |
| 305        | Bangladesh                             | HMPC     | Southern Asia                   | 51                     | 26      | 77      | 3                                | 2     | 5      | 5.8824                  | 7.6923   | 6.4935  |         |
| 330        | India                                  | HMPC     | Southern Asia                   | 2,335                  | 1,735   | 4,070   | 122                              | 72    | 194    | 5.2248                  | 4.1499   | 4.7666  |         |
| 332        | Iran, Islamic Republic of              | HMPC     | Southern Asia                   | 8                      | 6       | 14      |                                  |       |        |                         |          |         |         |
| 342        | Nepal                                  | HMPC     | Southern Asia                   | 2                      | 5       | 5       |                                  |       |        |                         |          |         |         |
| 344        | Pakistan                               | HMPC     | Southern Asia                   | 1,853                  | 861     | 2,714   | 92                               | 42    | 134    | 4.9649                  | 4.8780   | 4.9374  |         |
| 311        | Sri Lanka                              | HMPC     | Southern Asia                   | 505                    | 307     | 812     | 27                               | 18    | 45     | 5.3465                  | 5.8632   | 5.5419  |         |
| 402        | Angola                                 | HMPC     | sub-Saharan Africa              | 6                      | 11      | 17      |                                  |       |        |                         |          |         |         |
| 406        | Benin                                  | HMPC     | sub-Saharan Africa              | 14                     | 10      | 24      |                                  | 1     | 1      | 0.0000                  | 10.0000  | 4.1667  |         |
| 409        | Burkina Faso                           | HMPC     | sub-Saharan Africa              | 186                    | 87      | 273     | 1                                | 3     | 4      | 0.5376                  | 3.4483   | 1.4652  |         |
| 410        | Burundi                                | HMPC     | sub-Saharan Africa              | 3                      | 3       | 3       |                                  |       |        |                         |          |         |         |
| 411        | Cameroun                               | HMPC     | sub-Saharan Africa              | 31                     | 43      | 74      | 1                                |       | 1      | 3.2258                  | 0.0000   | 1.3514  |         |
| 413        | Cape Verde                             | HMPC     | sub-Saharan Africa              | 3                      | 7       | 10      |                                  |       |        |                         |          |         |         |
| 414        | Central African Republic               | HMPC     | sub-Saharan Africa              | 2                      | 2       | 2       |                                  |       |        | 0.0000                  | 0.0000   | 0.0000  |         |
| 415        | Chad                                   | HMPC     | sub-Saharan Africa              | 2                      | 1       | 1       |                                  |       |        |                         |          |         |         |
| 418        | Congo                                  | HMPC     | sub-Saharan Africa              | 9                      | 7       | 16      |                                  | 1     | 1      | 0.0000                  | 14.2857  | 6.2500  |         |
| 463        | Congo, The Democratic Republic of The  | HMPC     | sub-Saharan Africa              | 15                     | 11      | 26      |                                  | 1     | 1      | 0.0000                  | 9.0909   | 3.8462  |         |
| 404        | Côte D'Ivoire                          | HMPC     | sub-Saharan Africa              | 114                    | 71      | 185     | 2                                | 2     | 4      | 1.7544                  | 0.0000   | 1.0811  |         |
| 424        | Djibouti                               | HMPC     | sub-Saharan Africa              | 2                      | 1       | 1       |                                  | 1     | 1      | 100.0000                | 100.0000 |         |         |
| 427        | Equatorial Guinea                      | HMPC     | sub-Saharan Africa              | 1                      | 1       | 1       |                                  |       |        |                         |          |         |         |
| 466        | Eritrea                                | HMPC     | sub-Saharan Africa              | 17                     | 14      | 31      |                                  |       |        |                         |          |         |         |
| 420        | Ethiopia                               | HMPC     | sub-Saharan Africa              | 16                     | 32      | 48      |                                  |       |        |                         |          |         |         |
| 421        | Gabon                                  | HMPC     | sub-Saharan Africa              | 1                      | 1       | 1       |                                  |       |        |                         |          |         |         |
| 422        | Gambia                                 | HMPC     | sub-Saharan Africa              | 4                      | 2       | 6       |                                  | 1     | 1      | 25.0000                 | 0.0000   | 16.6667 |         |
| 423        | Ghana                                  | HMPC     | sub-Saharan Africa              | 1,058                  | 756     | 1,814   | 31                               | 24    | 55     | 2.9301                  | 3.1746   | 3.0320  |         |
| 425        | Guinea                                 | HMPC     | sub-Saharan Africa              | 58                     | 32      | 90      |                                  |       |        |                         |          |         |         |
| 426        | Guinea-Bissau                          | HMPC     | sub-Saharan Africa              | 1                      | 1       | 1       |                                  |       |        |                         |          |         |         |
| 428        | Kenya                                  | HMPC     | sub-Saharan Africa              | 2                      | 4       | 6       |                                  |       |        |                         |          |         |         |
| 429        | Lesotho                                | HMPC     | sub-Saharan Africa              | 1                      | 1       | 1       |                                  |       |        |                         |          |         |         |
| 430        | Liberia                                | HMPC     | sub-Saharan Africa              | 61                     | 6       | 67      |                                  |       |        |                         |          |         |         |
| 432        | Madagascar                             | HMPC     | sub-Saharan Africa              | 2                      | 1       | 3       |                                  |       |        |                         |          |         |         |
| 435        | Mali                                   | HMPC     | sub-Saharan Africa              | 14                     | 4       | 18      |                                  |       |        |                         |          |         |         |
| 437        | Mauritania                             | HMPC     | sub-Saharan Africa              | 2                      | 1       | 3       |                                  |       |        |                         |          |         |         |
| 438        | Mauritius                              | HMPC     | sub-Saharan Africa              | 36                     | 38      | 74      |                                  | 1     | 1      | 11.1111                 | 2.6316   | 6.7568  |         |
| 440        | Mozambique                             |          |                                 |                        |         |         |                                  |       |        |                         |          |         |         |
